# Supplementary material for: Near-Infrared Spectroscopy with Supervised Machine Learning as a Screening Tool for Neutropenia
Source: MDPI journal article supplement (doi:10.3390/jpm14010009), 2023-12-21
Supplement: s1 [file s1]

## Supporting Information

### 1. Outlier Detection

Hotelling's  $T^2 \times Q$  residuals are statistical techniques used in multivariate analysis to detect outliers and assess the quality of a statistical model. Hotelling's  $T^2$  statistic is a multivariate generalization of Student's t-test. It measures how far the sample mean vector of a multivariate dataset is from the population mean vector, accounting for the correlation structure between variables.  $Q$  residuals are used to identify univariate outliers in a multivariate dataset. It measures the Mahalanobis distance of individual observations from the centroid (mean vector) of the dataset, considering the correlation between variables.

#### 1.1 Hotelling $T^2 \times Q$ plot

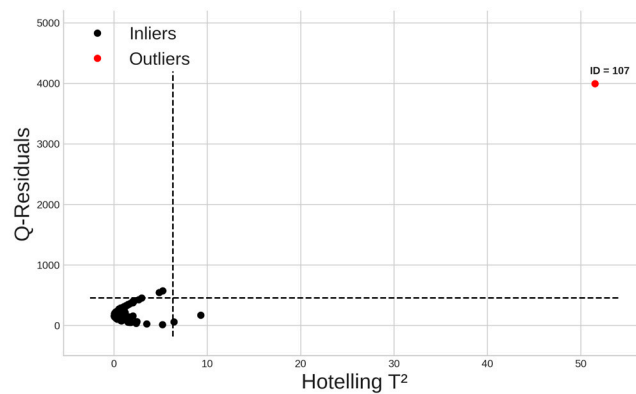

**Figure S1.** Hotelling  $T^2 \times Q$  plot evidencing one outlier (patient id = 107).

#### 1.2 Outlier spectra

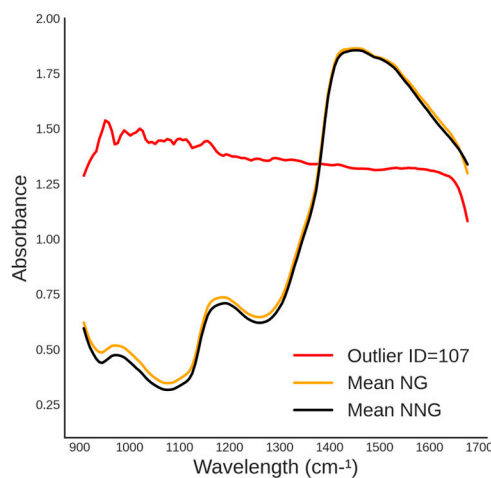

**Figure S2.** Outlier spectra versus average spectra per group (NG  $\times$  NNG).
